# Supplementary material for: Ionic liquid polymer functionalized carbon nanotubes-coated polyaniline for the solid-phase microextraction of benzene derivatives
Source: Royal Society of Chemistry journal article supplement (doi:10.1039/c5ra19027d), 2015-01-01
Supplement: c5ra19027d1.pdf [file c5ra19027d1.pdf]

## **Ionic liquid polymer functionalized carbon nanotubes-coated polyaniline for the solid-phase microextraction of benzene derivatives**

Mian Wu, Liying Wang, Faqiong Zhao, Baizhao Zeng\*

Key Laboratory of Analytical Chemistry for Biology and Medicine (Ministry of Education),  
College of Chemistry and Molecular Sciences, Wuhan University, Wuhan 430072, Hubei  
Province, P. R. China

Corresponding author: Baizhao Zeng

Tel. : 86-27-68752701

Fax : 86-27-68754067

E-mail : [bzzeng@whu.edu.cn](mailto:bzzeng@whu.edu.cn)

---

\* Corresponding author. Tel: 86-27-68752701, Fax: 86-27-68754067.  
E-mail address: [bzzeng@whu.edu.cn](mailto:bzzeng@whu.edu.cn)

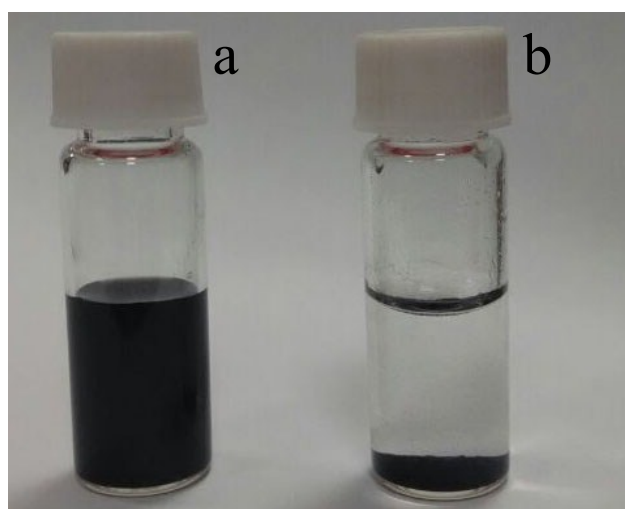

**Fig. S1.** The photographs of PIL/MWCNTs (a) and MWCNTs (b) dispersed in DMF.

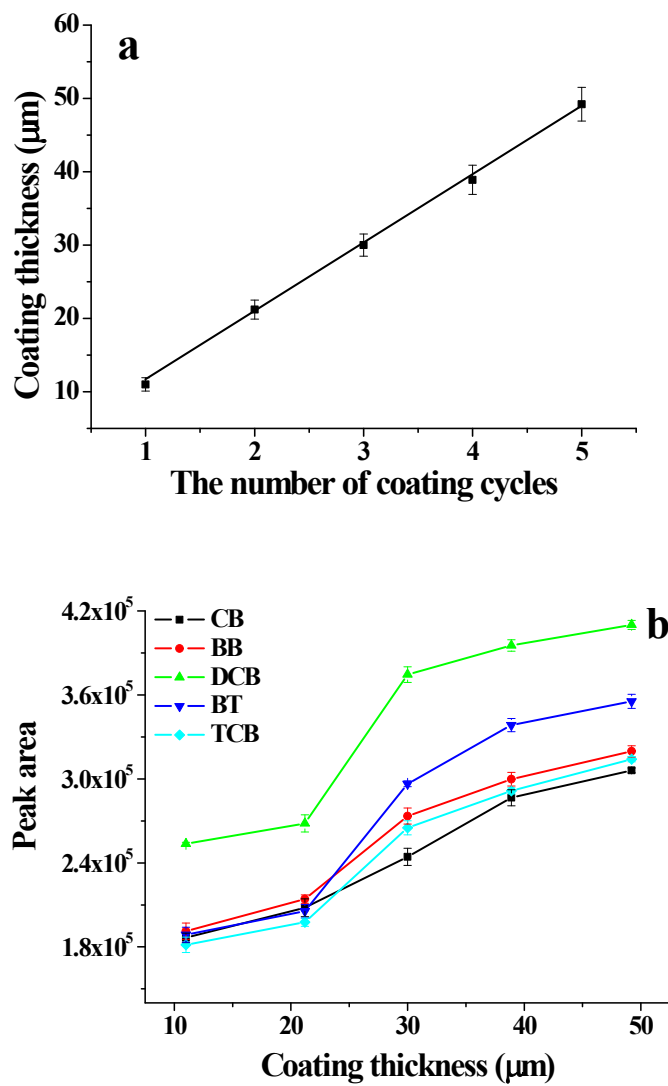

**Fig. S2.** (a) Variation of the coating thickness (average thickness of five fibers) with the number of coating cycles; (b) variation of enrichment efficiency (error bar shows the standard deviation for triplicate extractions) with coating thickness.

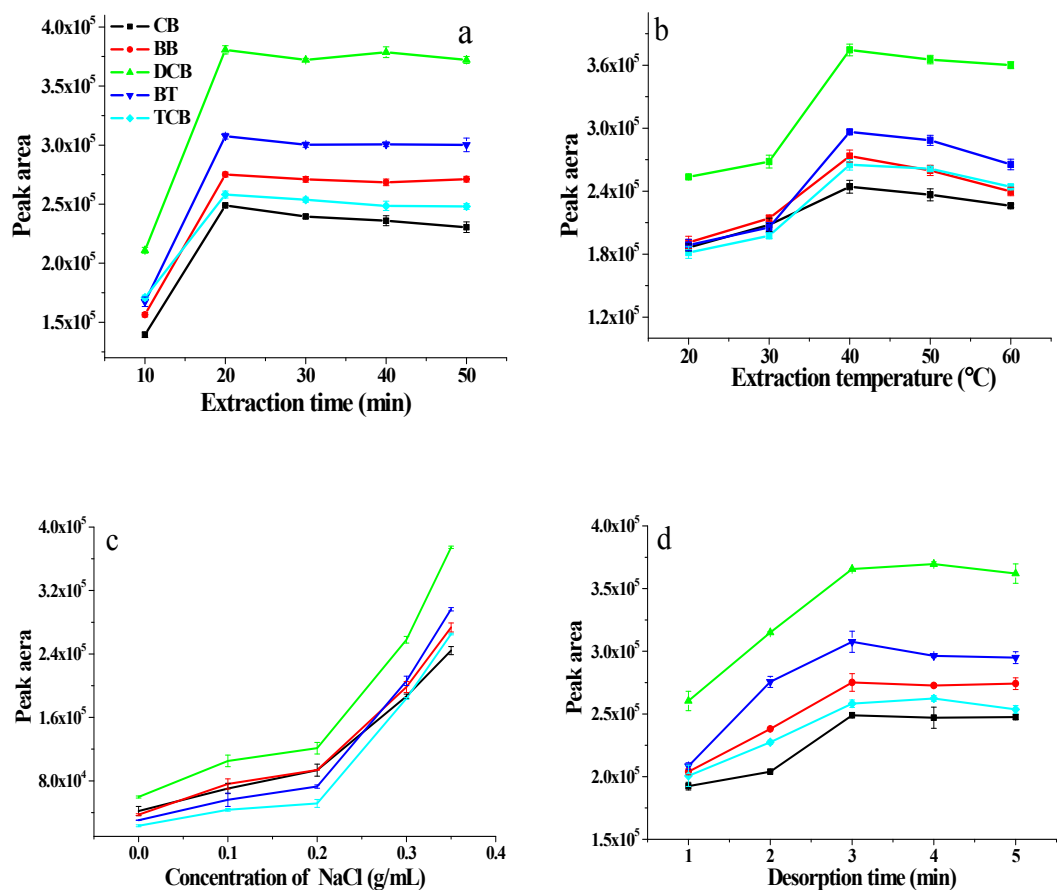

**Fig. S3.** Influence of extraction time (a), extraction temperature (b) and NaCl concentration (c) on extraction efficiency of PANI-PIL/MWCNTs coating for 50  $\mu\text{g/L}$  benzene derivatives; (d) influence of desorption time on peak area. Error bars show the standard deviation ( $n = 3$ ).

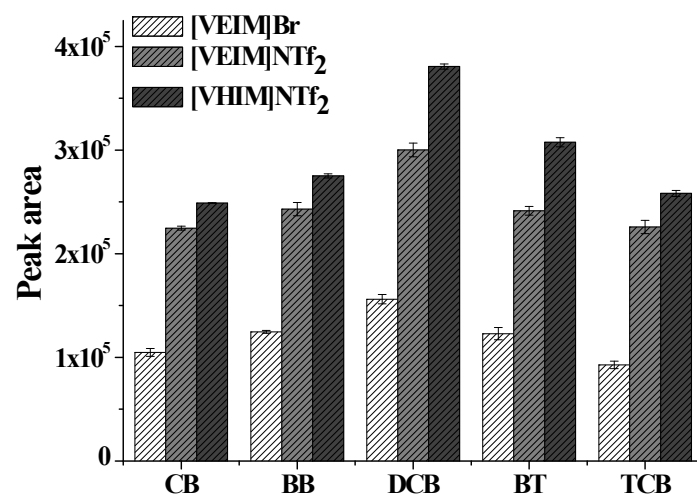

**Fig. S4.** Influence of ILs on the extraction efficiency of the resulting PANI-PIL/MWCNTs coating for 50  $\mu\text{g/L}$  benzene derivatives. Error bars show the standard deviation ( $n = 3$ ).

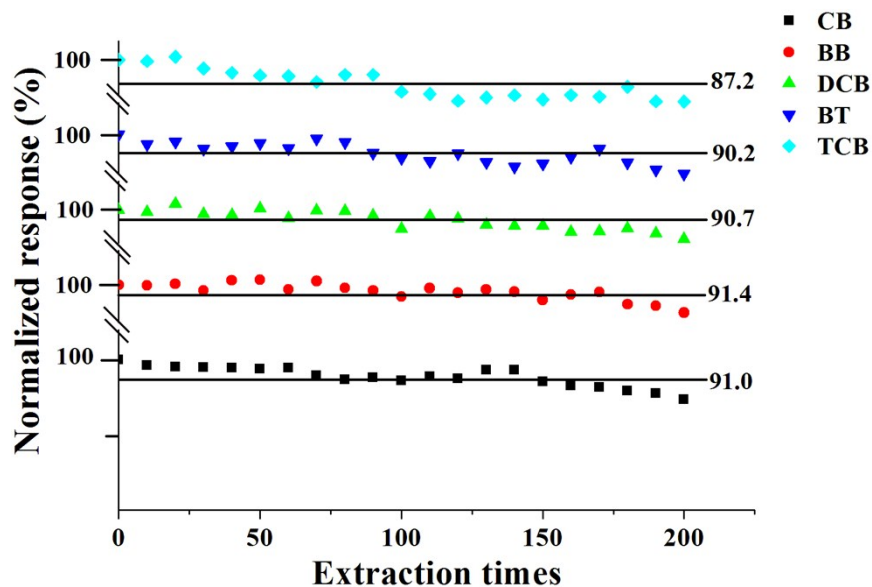

**Fig. S5.** Variation of the extraction efficiency of PANI-PIL/MWCNTs fiber with extraction times used. HS-SPME was performed in 10 mL aqueous solution containing 50  $\mu\text{g/L}$  benzene derivatives. The solid lines represented average values of the 200 extractions (using a single fiber). Normalization was performed by taking the extraction efficiency of the first extraction for each analyte as 100%.

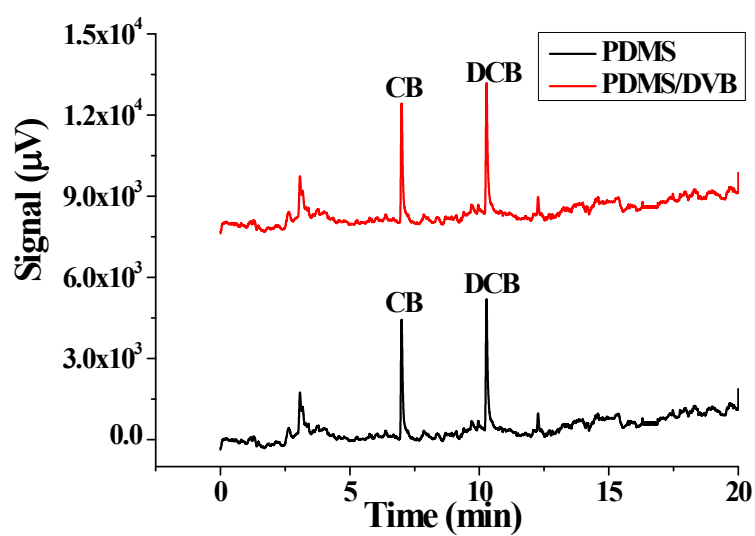

**Fig. S6.** Chromatograms of benzene derivatives in Sample 2 after extracted with the PDMS and PDMS/DVB fibers. Extraction temperature, 40 °C; extraction time, 20 min; medium, saturated NaCl; desorption temperature, 250 °C; desorption time, 3 min.
